# Supplementary material for: A Biomimetic Electrospun Membrane Supports the Differentiation and Maturation of Kidney Epithelium from Human Stem Cells
Source: MDPI journal article supplement (doi:10.3390/bioengineering9050188), 2022-04-26
Supplement: s1 [file s1]

## Supplementary Information

### A biomimetic electrospun membrane supports the differentiation and maturation of kidney epithelium from human stem cells

#### Authors

Xingrui Mou<sup>1</sup>, Jessica Shah<sup>1</sup>, Rohan Bhattacharya<sup>1,2</sup>, Titilola D. Kalejaiye<sup>1</sup>, Bowen Sun<sup>3</sup>, Po-Chun Hsu<sup>3</sup>, Samira Musah<sup>1,2,4,5,6,\*</sup>

#### Author affiliations

<sup>1</sup>Department of Biomedical Engineering, Pratt School of Engineering, Duke University, Durham, NC 27708, USA

<sup>2</sup>Center for Biomolecular and Tissue Engineering, Duke University, Durham, NC 27708, USA

<sup>3</sup>Department of Mechanical Engineering and Material Sciences, Pratt School of Engineering, Duke University, Durham, NC 27708, USA

<sup>4</sup>Division of Nephrology, Department of Medicine, Duke University School of Medicine, Durham, NC 27710, USA

<sup>5</sup>Department of Cell Biology, Duke University, Durham, NC 27710, USA

<sup>6</sup>Affiliate Faculty of the Developmental and Stem Cell Biology Program, Duke Regeneration Center, and Duke MEDx Initiative

\*Correspondence: samira.musah@duke.edu

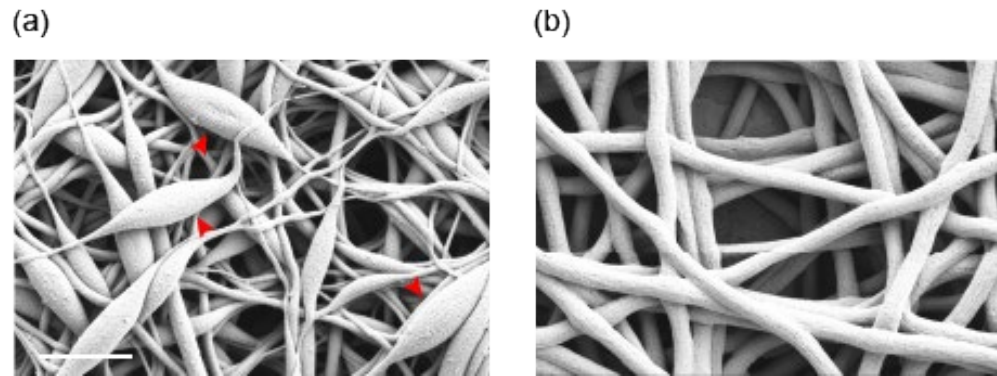

**Figure S1.** Effect of silk fibroin electrospinning solution content on the resulting nanofiber morphology. (a) Electrospun silk fibroin with a low PEO content (5%), where bead-like defects can be observed. Red arrowheads, examples of beaded structure. (b) Electrospun silk fibroin with a high PEO content (10%), where uniform nanofibers were generated. Scale bar 2.5  $\mu\text{m}$ .

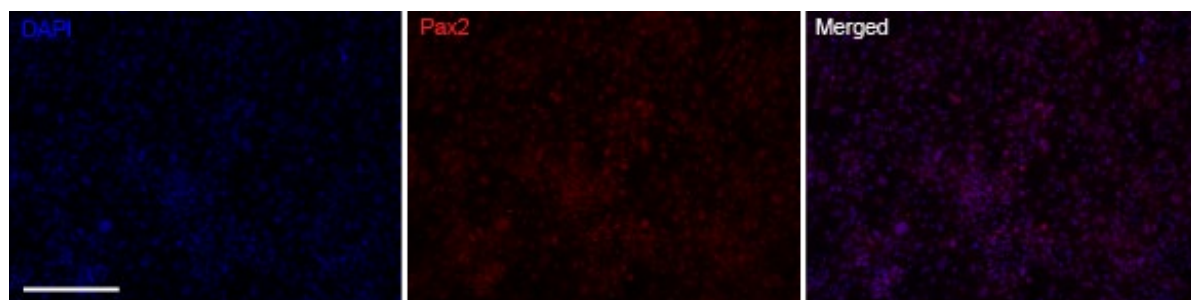

**Figure S2.** Immunostaining of hiPS cell-derived intermediate mesoderm cells for Pax2 (red, middle). Cells were counterstained with DAPI (blue, left). Merged view of the cells is shown on the right. Scale bar 275  $\mu$ m.

**Table S1.** List of the primers used in the RT-qPCR quantification experiment.

| Gene name    | Name      | Sequence                |
|--------------|-----------|-------------------------|
| GAPDH        | GAPDH-F   | GGAGCGAGATCCCTCCAAAAT   |
|              | GAPDH-R   | GGCTGTTGTCATACTTCTCATGG |
| PAX2         | PAX2-F    | AGATTCCCAGAGTGGTGTGG    |
|              | PAX2-R    | CTCAAAGACCCGATCCAAAG    |
| Nephrin      | Nephrin-F | GCTTCTGCTCCTCTCCAATG    |
|              | Nephrin-R | CCCTGCCTCTGTCTTCTCTG    |
| WT1          | WT1-F     | GGGTACGAGAGCGATAACCA    |
|              | WT1-R     | TCTACCAGTGTGCTTCCTG     |
| Synaptopodin | Synpo S1  | CATTCTGGAGGAGTCGATGG    |
|              | Synpo AS1 | ATCCAGCAAGTCTGGATTCTG   |
